# Supplementary material
Source: PubMed Central journal article supplement (PMC3603512)
Supplement: supp_126.1.77_JCS106674.pdf [file supp_126.1.77_JCS106674.pdf]

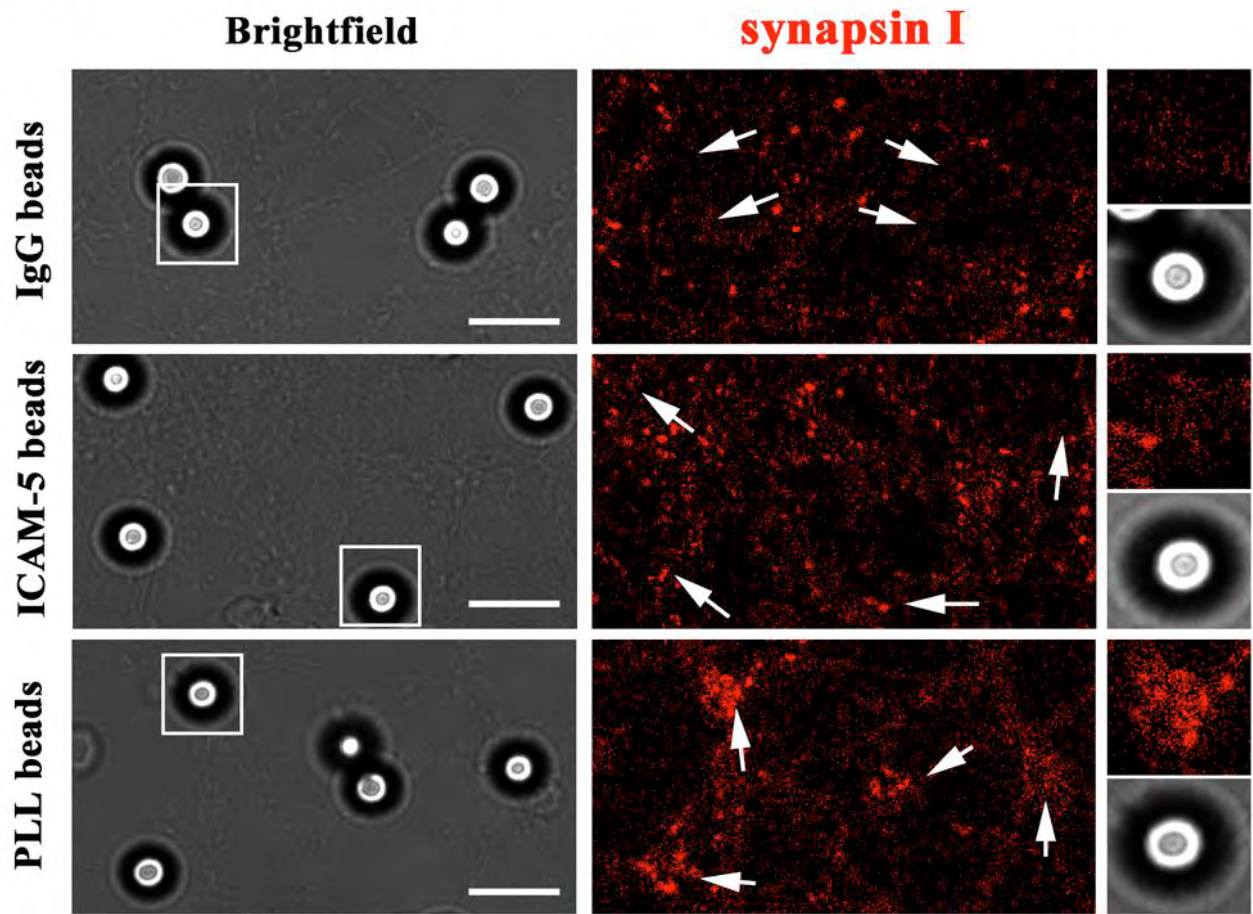

**Fig. S1. ICAM-5-Fc coated beads do not induce recruitment of synaptic proteins.** 13 DIV neurons incubated for 24 h with ICAM-5, human IgG or PLL-coated beads were fixed and stained for synapsin I (red). The DIC images were presented for each corresponding fluorescent image. Arrows indicate the location of beads. Small windows: higher magnification images of the selected area. PLL-coated beads efficiently recruited synapsin I, but ICAM-5 coated beads did not. Scale bar = 10  $\mu$ m.

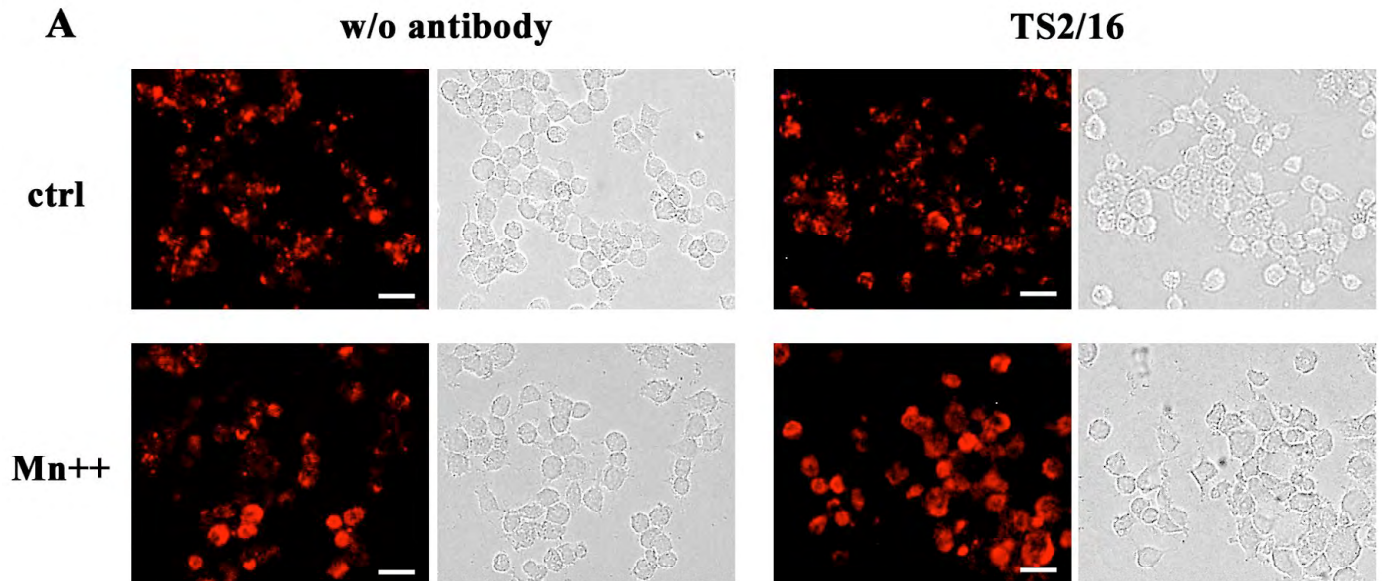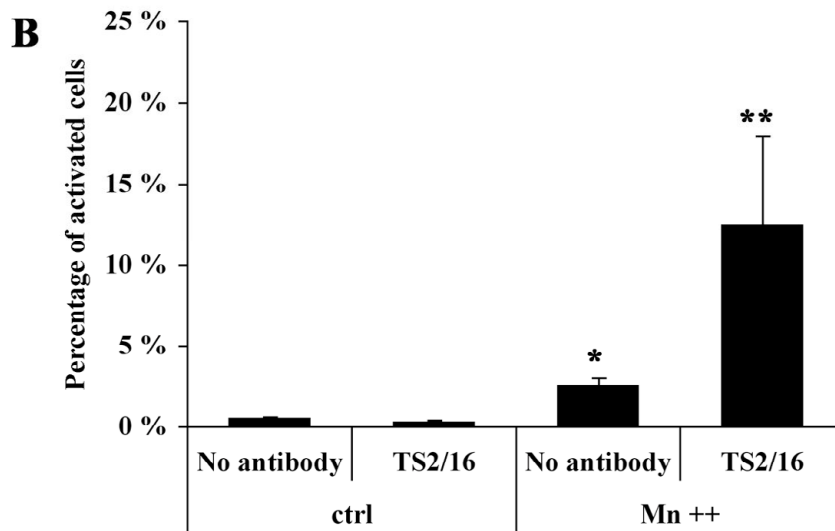

**Fig. S2. TS2/16 activates mouse  $\beta 1$  integrins.** (A) N2A cells were left untreated or treated with 10  $\mu\text{g/ml}$  TS2/16, with or without 1 mM  $\text{MnCl}_2$  and then immunostained with antibody 9EG7. In the presence of  $\text{Mn}^{++}$ , the number of activated N2A cells significantly increased. Activated cells: cells with fully distributed activated  $\beta 1$  integrin-immunosignal along the membrane. Scale bar = 20  $\mu\text{m}$ . (B) Quantification of activated N2A cells. Error bars indicate mean  $\pm$  s. d. \*:  $p < 0.01$ ; \*\*:  $p < 0.005$ .

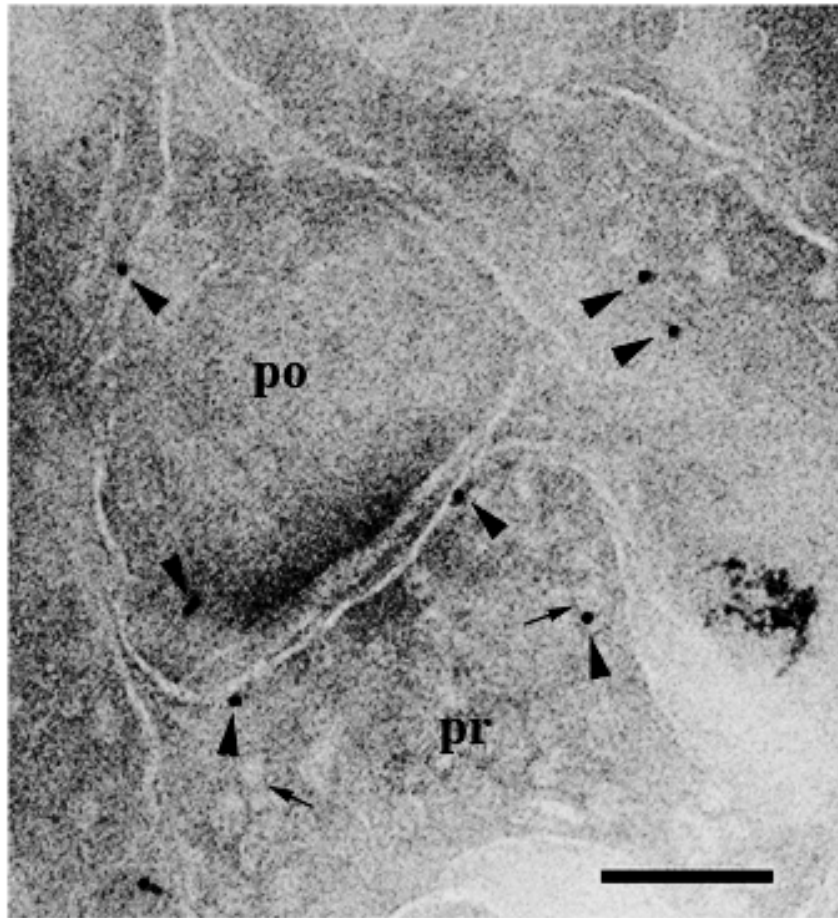

**Fig. S3. Immuno-electron microscopy studies on  $\beta 1$  integrins distribution at synapses.** Representative electron micrograph of synaptic contacts in the mouse hippocampal region. The  $\beta 1$  integrin polypeptide was labeled with  $\beta 1$  antibody conjugated to 10 nm gold particles (indicated by arrowheads). In the synaptic region,  $\beta 1$  integrins were found in the spine heads (post-synaptic sites, po) and in the active zone (az) and synaptic vesicles (sv, indicated by arrows) of the pre-synaptic terminals (pr). Scale bar = 0.2  $\mu\text{m}$ .

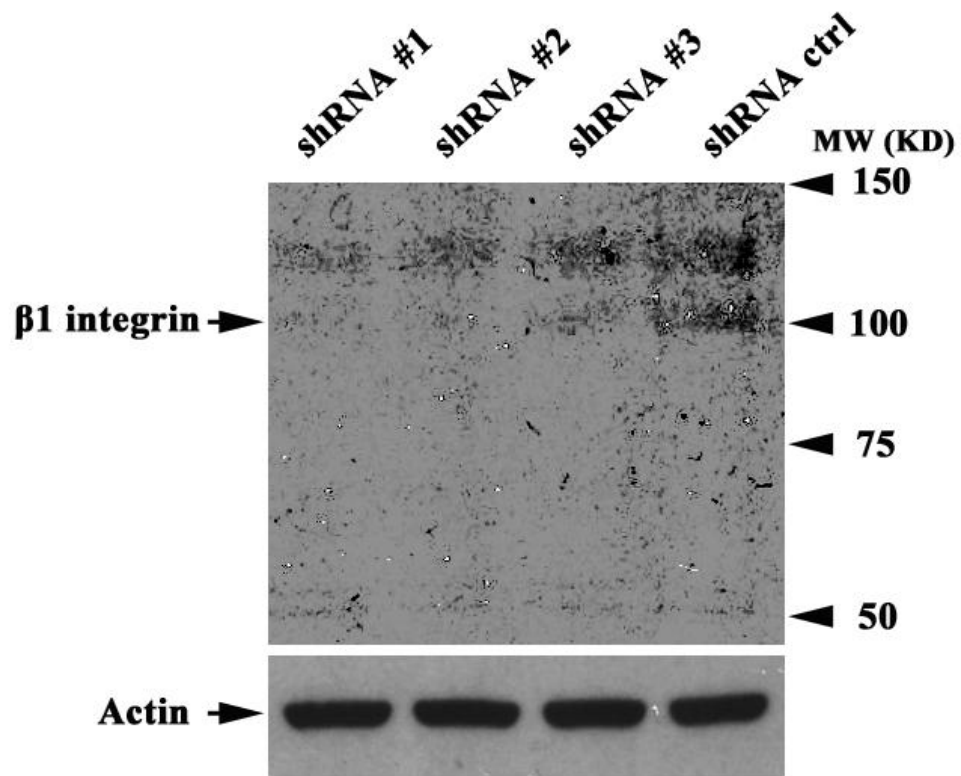

**Fig. S4. Lentiviral  $\beta 1$  integrin-shRNA down-regulates  $\beta 1$  integrin expression in N2A cells.** N2A cells were transfected with  $\beta 1$  integrin-shRNA plasmids V2LMM\_39157, V2LMM\_188403, V3LMM\_429934 and pGIPZ empty vector. Cell lysates were collected 48 hr after transfected and  $\beta 1$  integrin expression was detected by Western blotting.
